# Supplementary material for: TROP2 methylation and expression in tamoxifen-resistant breast cancer
Source: Springer Nature journal article supplement (doi:10.1186/s12935-018-0589-9), 2018-07-05
Supplement: MOESM1 [file 15914010]

Additional file 1: Table S1

| <b>Table S1. Changes in Global Methylation Between Tamoxifen-Resistant Cell Lines and MCF-7</b> |                              |                                                                                                                                                                                                    |                         |
|-------------------------------------------------------------------------------------------------|------------------------------|----------------------------------------------------------------------------------------------------------------------------------------------------------------------------------------------------|-------------------------|
|                                                                                                 | <b>Change in Methylation</b> | <b>Filter</b>                                                                                                                                                                                      | <b>No. of CpG Sites</b> |
| <b>TMX2-28 v. MCF-7</b>                                                                         | Hypermethylated              | Fold change $\geq 1.8$ in TMX2-28-Control (TMX2-28-Control/MCF-7-Control),<br>$\beta$ -value $\geq 0.1$ in TMX2-28-Control,<br>Detection p-value $\leq 0.01$ for TMX2-28-Control and MCF-7-Control | 37,501<br>(8%)          |
|                                                                                                 | Hypomethylated               | Fold change $\geq 1.8$ in MCF-7-Control (MCF-7-Control/TMX2-28-Control),<br>$\beta$ -value $\geq 0.1$ in MCF-7-Control,<br>Detection p-value $\leq 0.01$ for TMX2-28-Control and MCF-7-Control     | 14,956<br>(3%)          |
|                                                                                                 | No Change                    | Detection p-value $\leq 0.01$ for TMX2-28-Control and MCF-7-Control<br>(484,751) minus No. of hypermethylated and hypomethylated CpG sites                                                         | 432,294<br>(89%)        |
