# Supplementary material for: TROP2 methylation and expression in tamoxifen-resistant breast cancer
Source: Springer Nature journal article supplement (doi:10.1186/s12935-018-0589-9), 2018-07-05
Supplement: MOESM2 [file 15914010]

| <b>Table S2. Changes in Global Methylation Between 5-Aza-dC- and Control-Treated Cell Lines</b> |                              |                                                                                                                                                                                                    |                         |
|-------------------------------------------------------------------------------------------------|------------------------------|----------------------------------------------------------------------------------------------------------------------------------------------------------------------------------------------------|-------------------------|
|                                                                                                 | <b>Change in Methylation</b> | <b>Filter</b>                                                                                                                                                                                      | <b>No. of CpG Sites</b> |
| <b>TMX2-28-5-Aza-dC v. TMX2-28-Control</b>                                                      | Hypermethylated              | Fold change $\geq 1.8$ in TMX2-28-Aza (TMX2-28-5-Aza-dC/TMX2-28-Control), $\beta$ -value $\geq 0.1$ in TMX2-28-5-Aza-dC, Detection p-value $\leq 0.01$ for TMX2-28-5-Aza-dC and TMX2-28-Control    | 59<br>(0.01%)           |
|                                                                                                 | Hypomethylated               | Fold change $\geq 1.8$ in TMX2-28-Control (TMX2-28-Control/TMX2-28-5-Aza-dC), $\beta$ -value $\geq 0.1$ in TMX2-28-Control, Detection p-value $\leq 0.01$ for TMX2-28-5-Aza-dC and TMX2-28-Control | 6,637<br>(1%)           |
|                                                                                                 | No Change                    | Detection p-value $\leq 0.01$ for TMX2-28-Control and TMX2-28-5-Aza-dC (484,841) minus No. of hypermethylated and hypomethylated CpG sites                                                         | 478,145<br>(99%)        |
| <b>MCF-7-5-Aza-dC v. MCF-7-Control</b>                                                          | Hypermethylated              | Fold change $\geq 1.8$ in MCF-7-5-Aza-dC (MCF-7-5-Aza-dC/MCF-7-Control), $\beta$ -value $\geq 0.1$ in MCF-7-5-Aza-dC, Detection p-value $\leq 0.01$ for MCF-7-5-Aza-dC And MCF-7-Control           | 32<br>(0.01%)           |
|                                                                                                 | Hypomethylated               | Fold change $\geq 1.8$ in MCF-7-Control (MCF-7-Control/ MCF-7-5-Aza-dC), $\beta$ -value $\geq 0.1$ in MCF-7-Control, Detection p-value $\leq 0.01$ for MCF-7-5-Aza-dC and MCF-7-Control            | 1,050<br>(0.2%)         |
|                                                                                                 | No Change                    | Detection p-value $\leq 0.01$ for MCF-7-Control and MCF-7-5-Aza-dC (485,577) minus No. of hypermethylated and hypomethylated CpG sites                                                             | 484,495<br>(99%)        |
