# Supplementary material for: TROP2 methylation and expression in tamoxifen-resistant breast cancer
Source: Springer Nature journal article supplement (doi:10.1186/s12935-018-0589-9), 2018-07-05
Supplement: MOESM3 [file 15914010]

| <b>Table S3. Hypermethylated CpG Sites in TMX2-28 compared to MCF-7 that have decreased methylation after 5-Aza-dC treatment</b> |                                                                                                                                                                                                                        |                         |
|----------------------------------------------------------------------------------------------------------------------------------|------------------------------------------------------------------------------------------------------------------------------------------------------------------------------------------------------------------------|-------------------------|
| <b>Change in Methylation</b>                                                                                                     | <b>Filter</b>                                                                                                                                                                                                          | <b>No. of CpG Sites</b> |
| Hypermethylated in TMX2-28 Compared to MCF-7                                                                                     | Fold change $\geq 1.8$ in TMX2-28-Control (TMX2-28-Control/MCF-7-Control),<br>$\beta$ -value $\geq 0.1$ in TMX2-28-Control,<br>Detection p-value $\leq 0.01$ for TMX2-28-Control and MCF-7-Control                     | 37,501                  |
| Decreased Methylation in TMX2-28 after 5-Aza-dC                                                                                  | Filter criteria from above and<br>Fold change $\geq 1.8$ in TMX2-28-Control (TMX2-28-Control/TMX2-28-5-Aza-dC),<br>$\beta$ -value $\geq 0.1$ in TMX2-28-Control,<br>Detection p-value $\leq 0.01$ for TMX2-28-5-Aza-dC | 707                     |
