# Supplementary material for: TROP2 methylation and expression in tamoxifen-resistant breast cancer
Source: Springer Nature journal article supplement (doi:10.1186/s12935-018-0589-9), 2018-07-05
Supplement: MOESM5 [file 15914010]

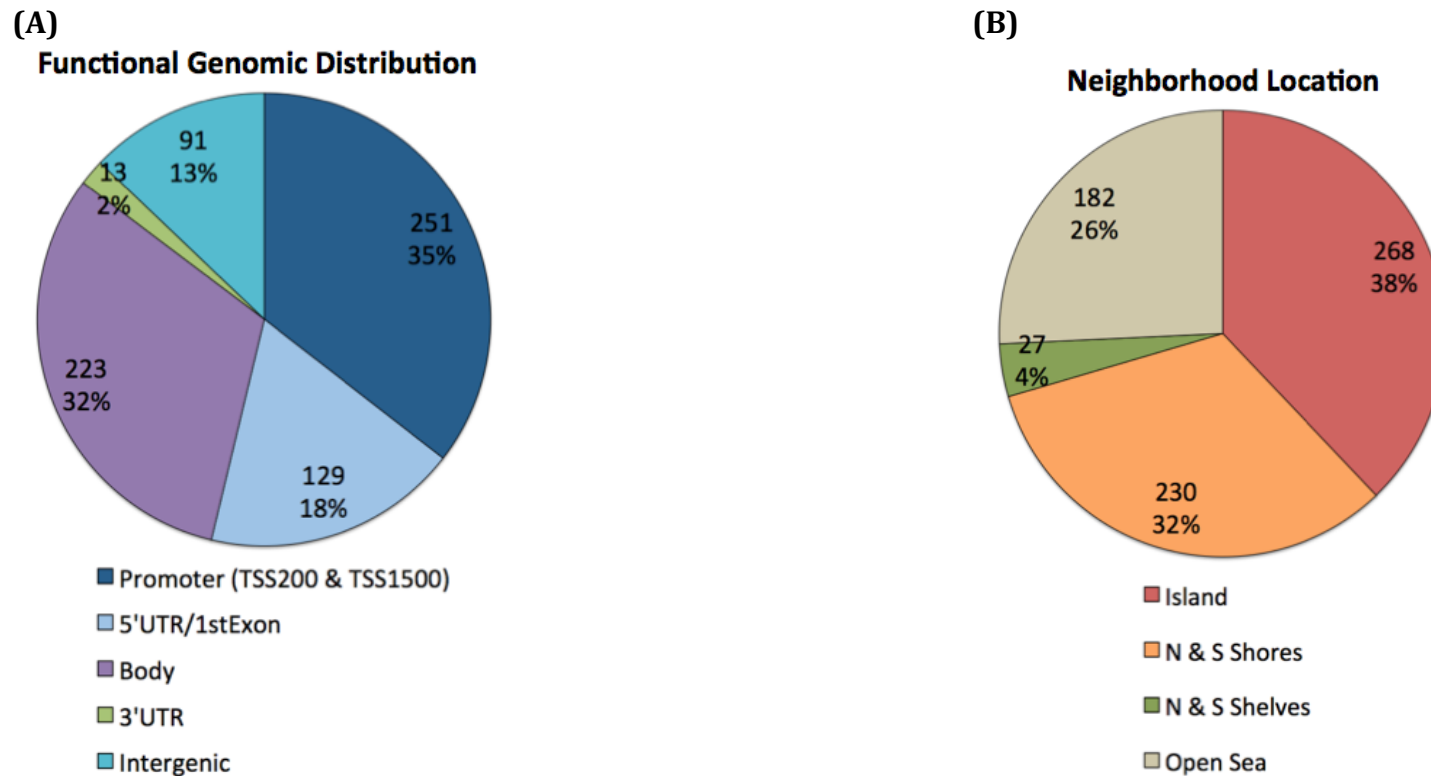

**Figure S1: Functional genomic location and neighborhood distribution of hypermethylated CpG Sites in TMX2-28 compared to MCF-7 that have decreased methylation after 5-Aza-dC treatment.** Pie charts indicate the functional genomic distribution (A) and neighborhood locations (B) defined by Illumina for the 707 CpG sites identified as having increased methylation in TMX2-28 compared to MCF-7 and also decreased methylation in TMX2-28 after 5-Aza-dC treatment.
