# Supplementary material for: TROP2 methylation and expression in tamoxifen-resistant breast cancer
Source: Springer Nature journal article supplement (doi:10.1186/s12935-018-0589-9), 2018-07-05
Supplement: MOESM6 [file 15914010]

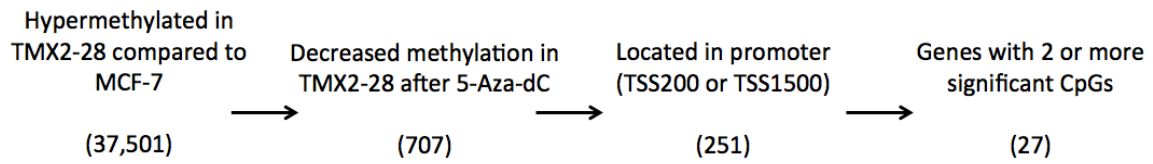

**Figure S2. Overview of selection process for target genes.** Flow chart describing the selection process and filtering utilized to identify genes with CpG sites located in the promoter that were hypermethylated in TMX2-28 compared to MCF-7 and had decreased methylation when TMX2-28 cells were treated with 5-Aza-dC. Number of CpG sites indicated in parentheses.
