# Supplementary material for: TROP2 methylation and expression in tamoxifen-resistant breast cancer
Source: Springer Nature journal article supplement (doi:10.1186/s12935-018-0589-9), 2018-07-05
Supplement: MOESM8 [file 15914010]

| <b>Table S7. Patient (n= 70) and tumor characteristics</b>                                                                                                                                                                                                                            |                                 |                                   |
|---------------------------------------------------------------------------------------------------------------------------------------------------------------------------------------------------------------------------------------------------------------------------------------|---------------------------------|-----------------------------------|
| <b>Age (in years) mean (SD), range</b>                                                                                                                                                                                                                                                |                                 |                                   |
| At Primary                                                                                                                                                                                                                                                                            | 56.6 (12.3), 37 - 84            |                                   |
| At Recurrence                                                                                                                                                                                                                                                                         | 64.1 (12.6), 39 - 90            |                                   |
| <b>Menopausal n (%)</b>                                                                                                                                                                                                                                                               |                                 |                                   |
| At Primary                                                                                                                                                                                                                                                                            | 13 (38%)                        |                                   |
| At Recurrence                                                                                                                                                                                                                                                                         | 21 (58%)                        |                                   |
| <b>TTR<sup>1</sup> (in months) mean (SD), range</b>                                                                                                                                                                                                                                   | 67.8 (59.5) 10-252              |                                   |
| <b>Tumors</b>                                                                                                                                                                                                                                                                         |                                 |                                   |
|                                                                                                                                                                                                                                                                                       | <b>Primary<sup>2</sup> (34)</b> | <b>Recurrent<sup>3</sup> (36)</b> |
| <b>ER status n (%)</b>                                                                                                                                                                                                                                                                |                                 |                                   |
| +                                                                                                                                                                                                                                                                                     | 26 (76.5)                       | 19 (52.8)                         |
| -                                                                                                                                                                                                                                                                                     | 8 (23.5)                        | 17 (47.2)                         |
| <b>PR status n (%)</b>                                                                                                                                                                                                                                                                |                                 |                                   |
| +                                                                                                                                                                                                                                                                                     | 20 (58.8)                       | 16 (44.4)                         |
| -                                                                                                                                                                                                                                                                                     | 14 (41.2)                       | 20 (55.6)                         |
| <b>HER2 status n (%)</b>                                                                                                                                                                                                                                                              |                                 |                                   |
| +                                                                                                                                                                                                                                                                                     | 5 (14.7)                        | 9 (25)                            |
| -                                                                                                                                                                                                                                                                                     | 29 (85.3)                       | 27 (75)                           |
| <b>Ki67 IHC n (%)</b>                                                                                                                                                                                                                                                                 |                                 |                                   |
| low ( $\leq 15$ )                                                                                                                                                                                                                                                                     | 26 (76.5)                       | 20 (55.6)                         |
| high ( $> 15$ )                                                                                                                                                                                                                                                                       | 8 (23.5)                        | 16 (44.4)                         |
| <b>Tumor Grade n (%)<sup>4</sup></b>                                                                                                                                                                                                                                                  |                                 |                                   |
| 0                                                                                                                                                                                                                                                                                     | 5 (15.1)                        | 5 (15.1)                          |
| 1                                                                                                                                                                                                                                                                                     | 5 (15.1)                        | 2 (6.1)                           |
| 2                                                                                                                                                                                                                                                                                     | 11 (33.3)                       | 5 (15.1)                          |
| 3                                                                                                                                                                                                                                                                                     | 12 (36.3)                       | 21 (63.6)                         |
| <b>Tumor Type n (%)</b>                                                                                                                                                                                                                                                               |                                 |                                   |
| DCIS                                                                                                                                                                                                                                                                                  | 5 (14.7)                        | 5 (13.9)                          |
| IDC                                                                                                                                                                                                                                                                                   | 23 (67.6)                       | 26 (72.2)                         |
| ILC                                                                                                                                                                                                                                                                                   | 4 (11.8)                        | 4 (11.1)                          |
| IDLC                                                                                                                                                                                                                                                                                  | 2 (5.9)                         | 1 (2.8)                           |
| <b>Tumor Size n (%)<sup>4</sup></b>                                                                                                                                                                                                                                                   |                                 |                                   |
| $\geq 20$ mm                                                                                                                                                                                                                                                                          | 13 (48.2)                       | 13 (52)                           |
| $< 20$ mm                                                                                                                                                                                                                                                                             | 14 (51.8)                       | 12 (48)                           |
| <b>Anti-hormonal Therapy n (%)<sup>4</sup></b>                                                                                                                                                                                                                                        |                                 |                                   |
| No                                                                                                                                                                                                                                                                                    | 7 (30.4)                        | NA                                |
| Yes, Tam                                                                                                                                                                                                                                                                              | 4 (17.4)                        | NA                                |
| Yes, AI                                                                                                                                                                                                                                                                               | 7 (30.4)                        | NA                                |
| Yes, Tam & AI                                                                                                                                                                                                                                                                         | 5 (21.8)                        | NA                                |
| <sup>1</sup> TTR = time to recurrence; <sup>2</sup> Primary tumors include the 8 non-recurrent tumors<br><sup>3</sup> Recurrent tumors include two metastatic tumors; <sup>4</sup> Indicates that data are missing for some samples; percentages are calculated on the available data |                                 |                                   |
