# Supplementary material for: TROP2 methylation and expression in tamoxifen-resistant breast cancer
Source: Springer Nature journal article supplement (doi:10.1186/s12935-018-0589-9), 2018-07-05
Supplement: MOESM9 [file 15914010]

| <b>Table S . Beta values for TACSTD2 methylation in clinical samples (ER-pos primaries that recur, mean of 3CpGs)</b> |         |                                                                  |         |
|-----------------------------------------------------------------------------------------------------------------------|---------|------------------------------------------------------------------|---------|
| <b>ER-pos Primary Tumor (n = 18)</b>                                                                                  |         | <b>Recurrent Tumor<br/>((ER-pos, n = 12) or (ER-neg, n = 6))</b> |         |
| Mean                                                                                                                  | 0.14167 | Mean                                                             | 0.13803 |
| Minimum                                                                                                               | 0.0859  | Minimum                                                          | 0.07132 |
| Maximum                                                                                                               | 0.26091 | Maximum                                                          | 0.19866 |
| Variance                                                                                                              | 0.00242 | Variance                                                         | 0.00151 |
| Standard Deviation                                                                                                    | 0.04924 | Standard Deviation                                               | 0.03889 |
